# Supplementary figures and images for: Pannexin-1 promotes the invasion of pituitary adenoma by modulating ATP release
Source: Research Square preprint supplement (doi:10.21203/rs.3.rs-806060/v1), 2021-08-12

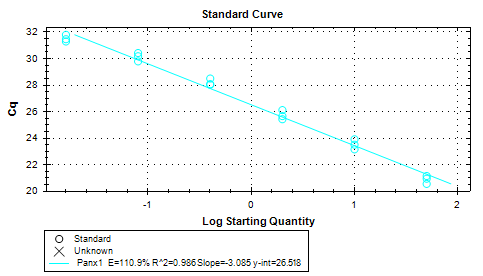

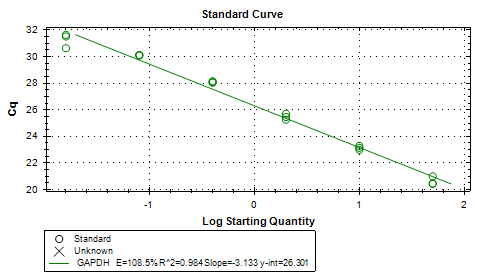


**Figure S1.** Amplification efficiency standard curve of target gene Panx1 and GAPDH

Supplement: Supplementary file 1 [file 629829f4f3cde315c8d26c81.docx]
